# Supplementary material for: Activation of the IRE1 RNase through remodeling of the kinase front pocket by ATP-competitive ligands
Source: PubMed Central journal article supplement (PMC7736581; doi:10.1038/s41467-020-19974-5), 2020-12-14
Supplement: 41467_2020_19974_MOESM5_ESM.pdf [file 41467_2020_19974_MOESM5_ESM.pdf]

# Supplementary Information

## Hydrogen-Deuterium exchange (HX-MS) deuteration plots

**Note:** human IRE1 residue numbering is significantly offset from the sequential numbering used in the peptide plots and tables.

For reference, residue 16 in HX data is equivalent to residue 562 in the PDB files referenced in the main text. (See Figure S1A)

Legend for plot colors:

26-44cs0 with 17 HX Sites.  
Sequence: CPKDVLGHGAEGTIVYRGM

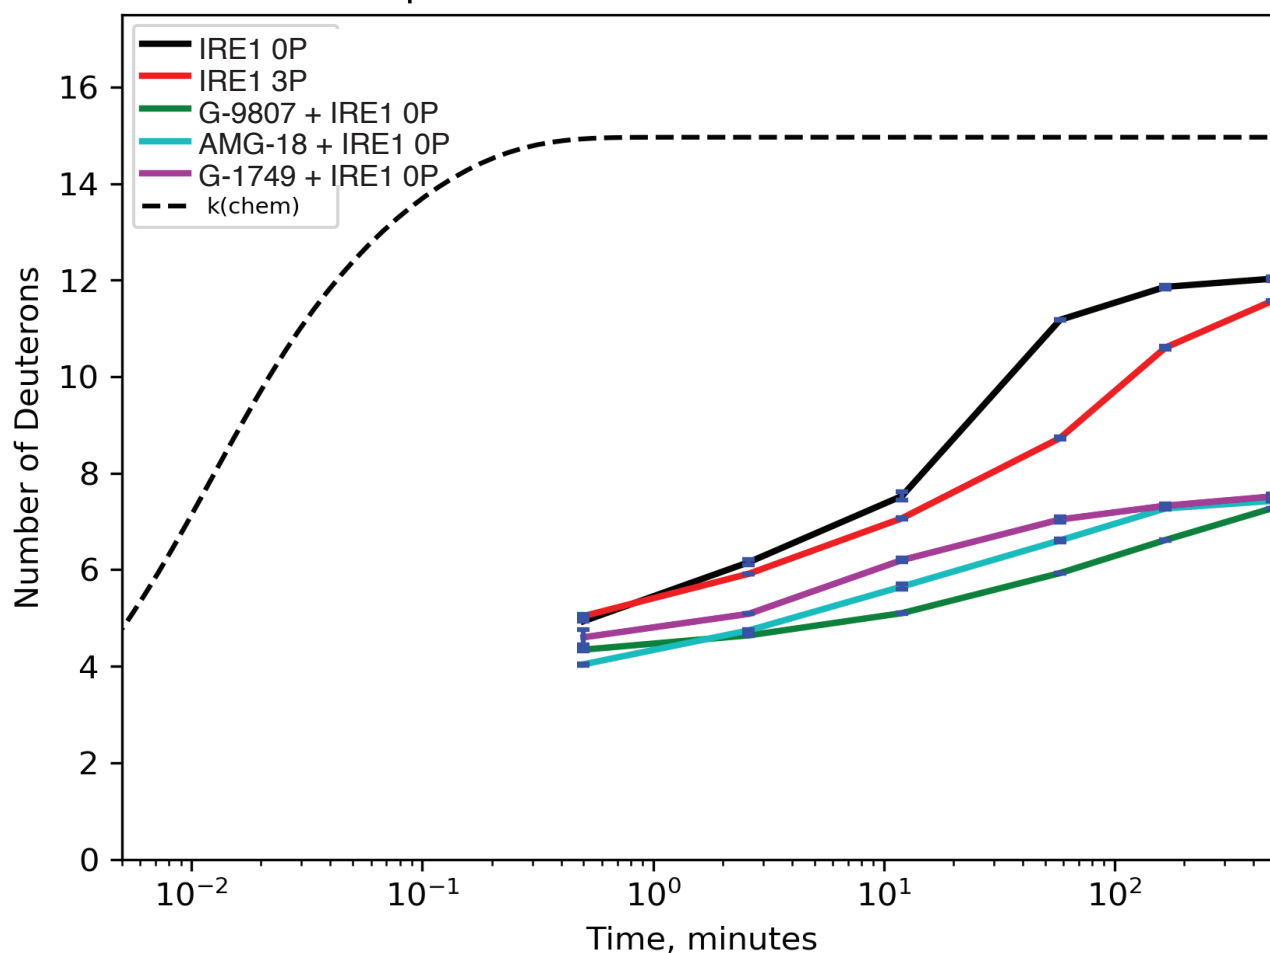

# IRE1 Uptake Traces

Number of Deuterons

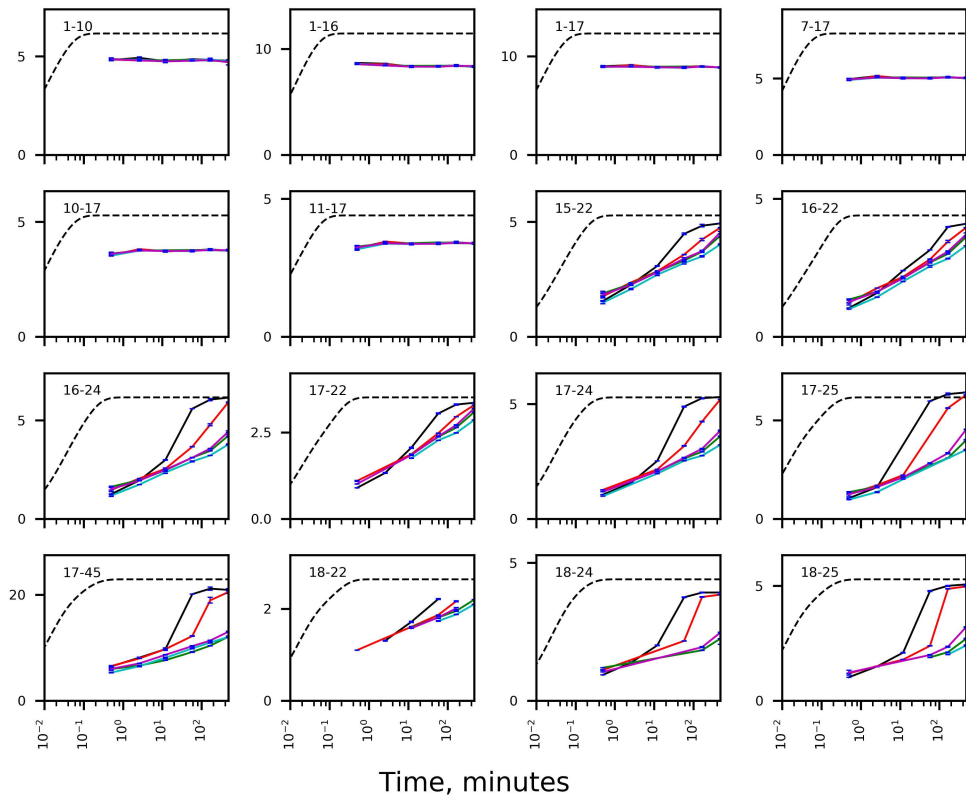

# IRE1 Uptake Traces

Number of Deuterons

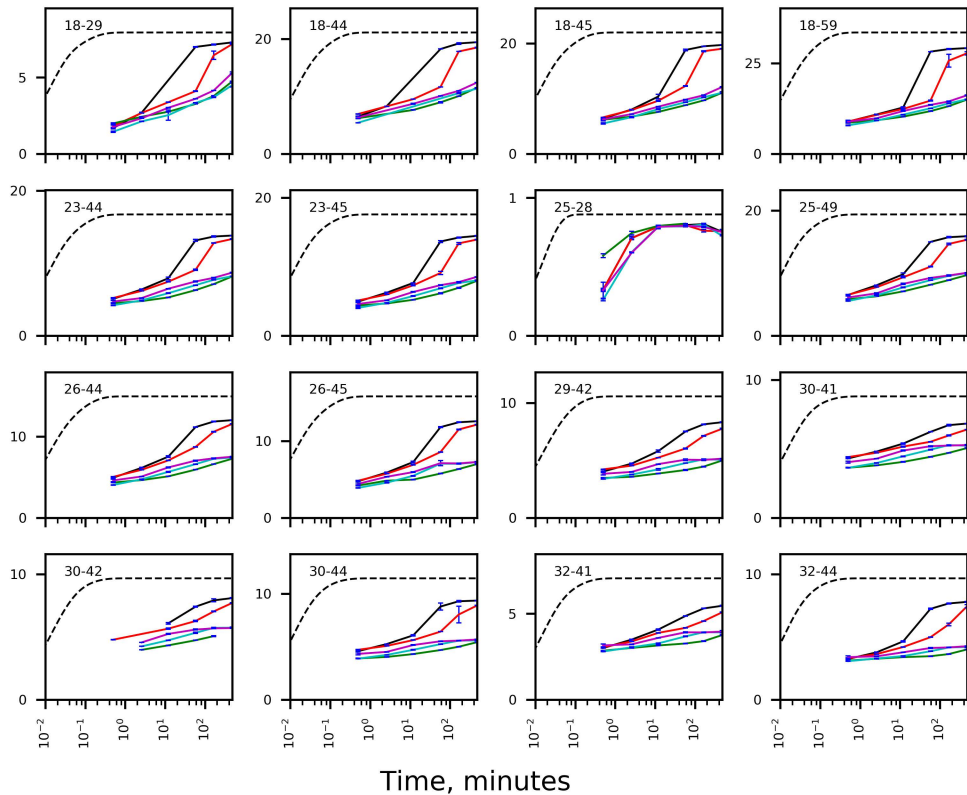

# IRE1 Uptake Traces

Number of Deuterons

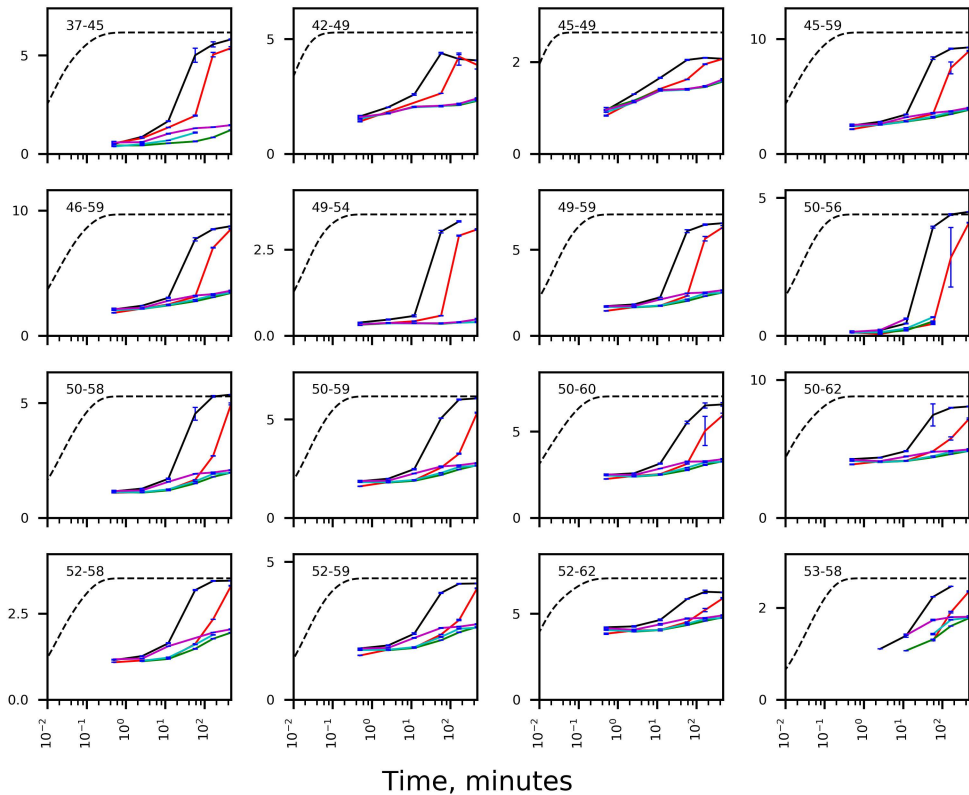



# IRE1 Uptake Traces

Number of Deuterons

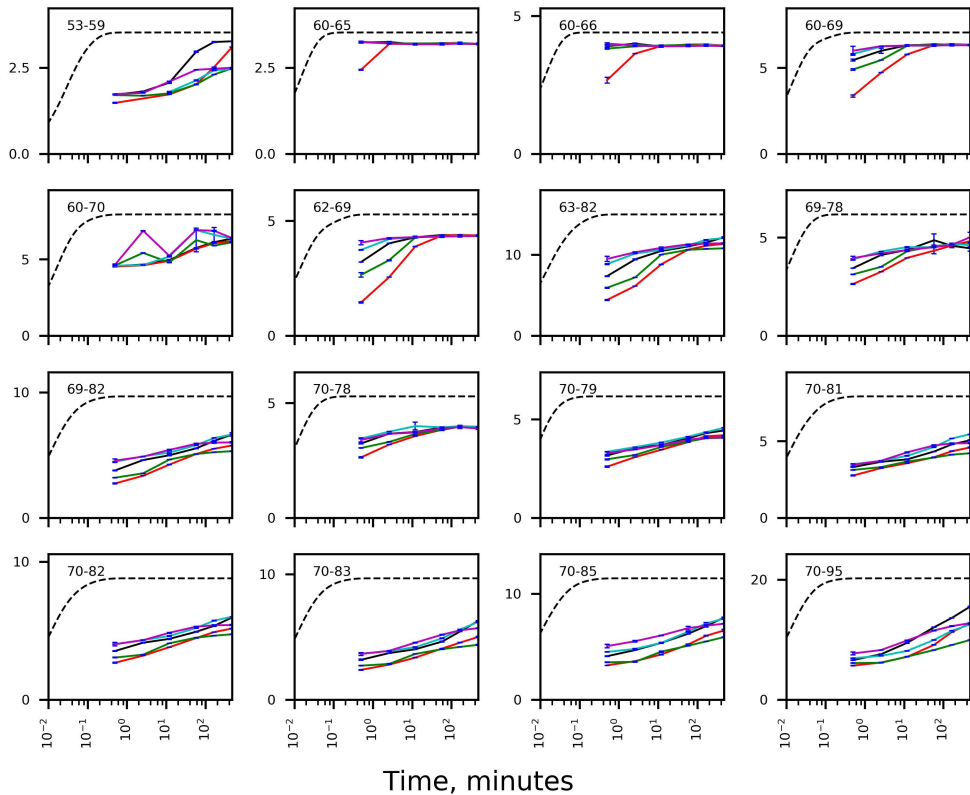

# IRE1 Uptake Traces

Number of Deuterons

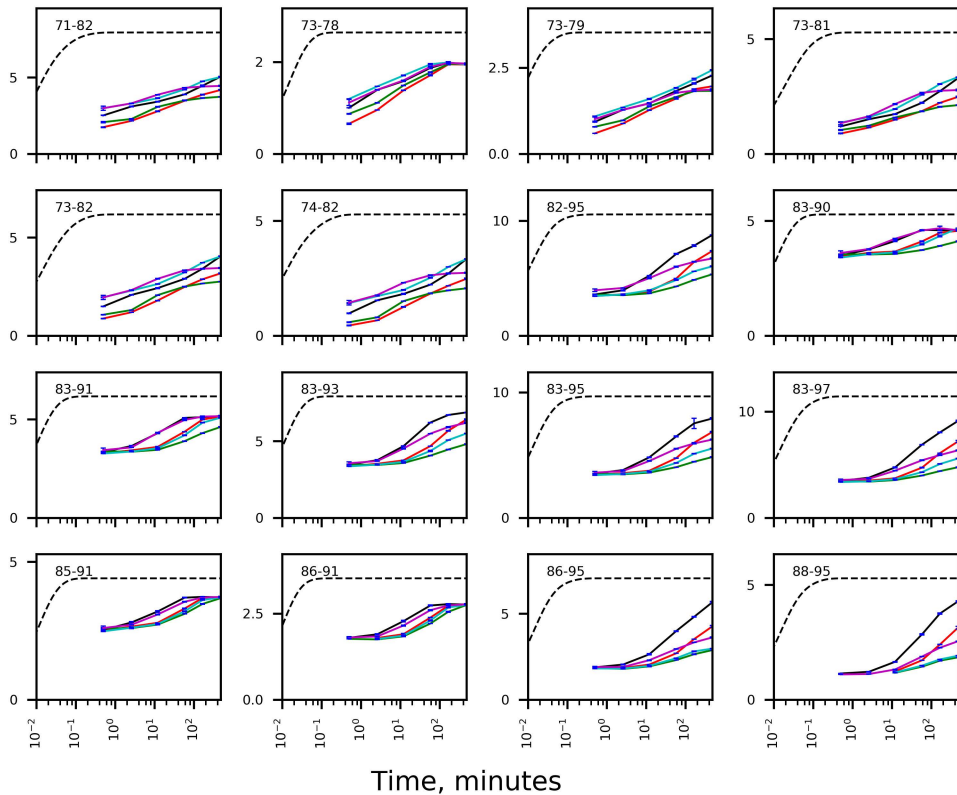

# IRE1 Uptake Traces

Number of Deuterons

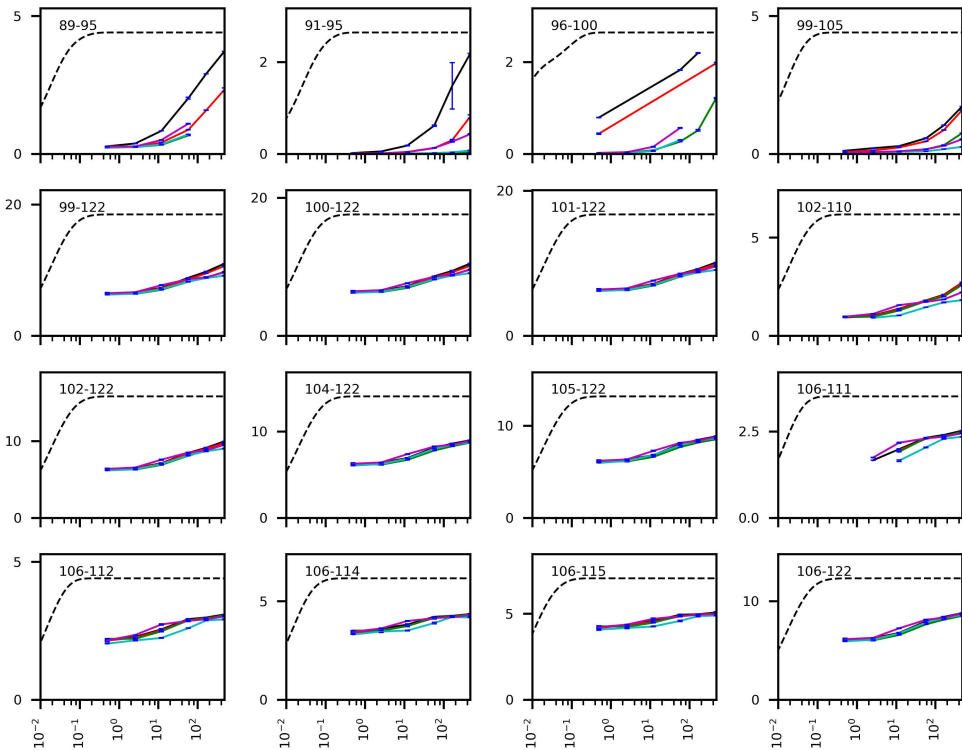

# IRE1 Uptake Traces

Number of Deuterons

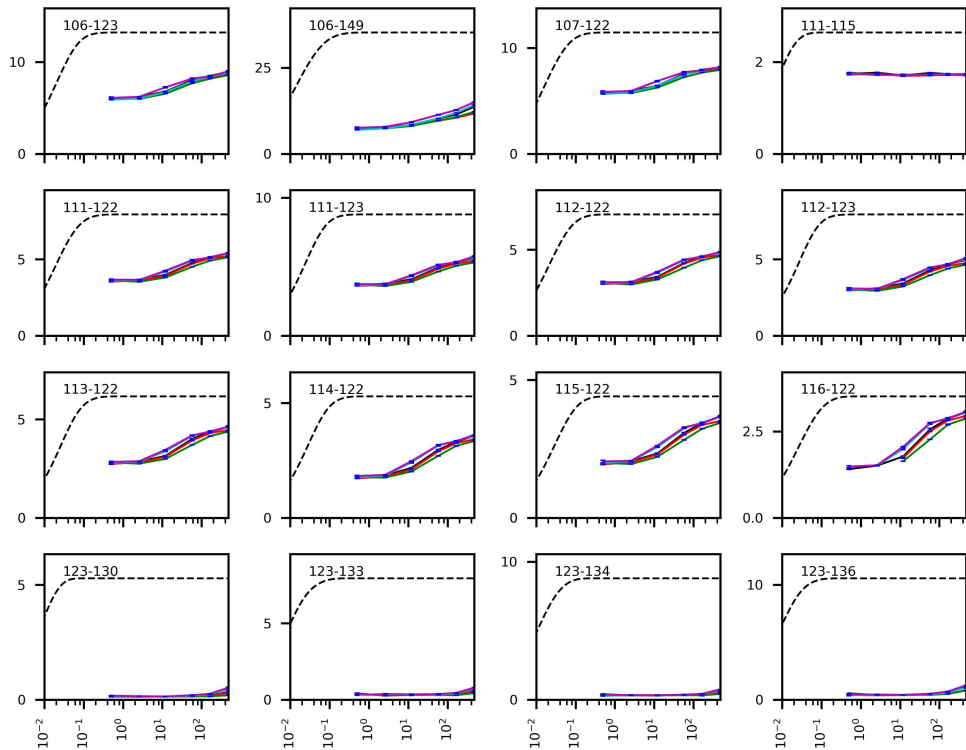

Time, minutes

# IRE1 Uptake Traces

Number of Deuterons

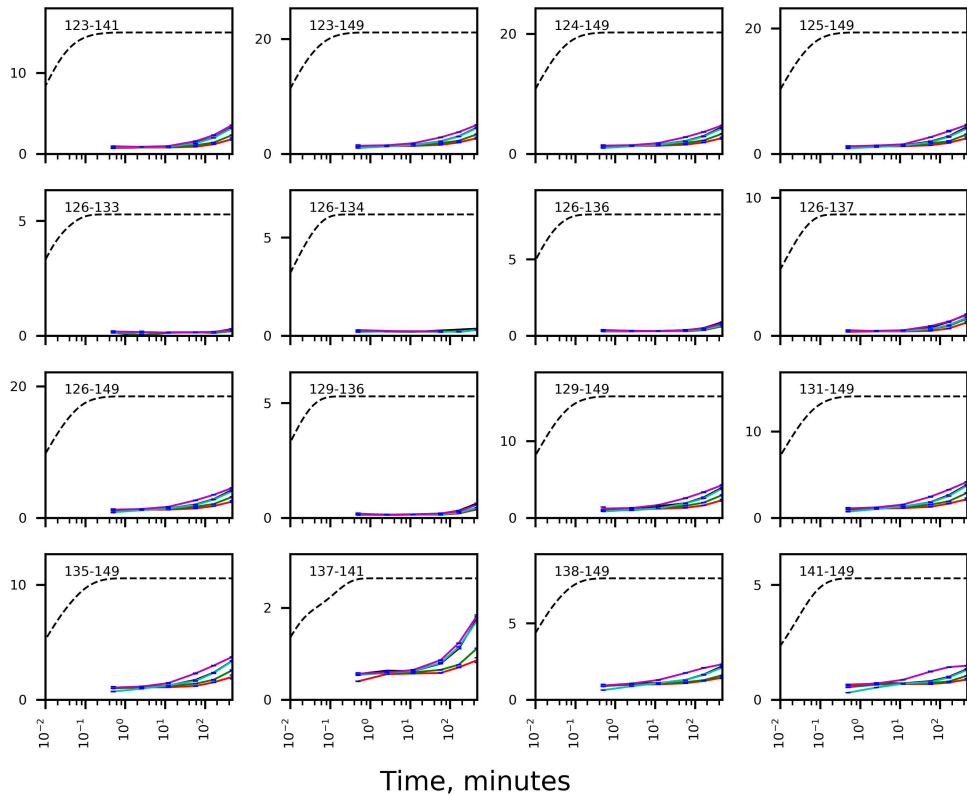

# IRE1 Uptake Traces

Number of Deuterons

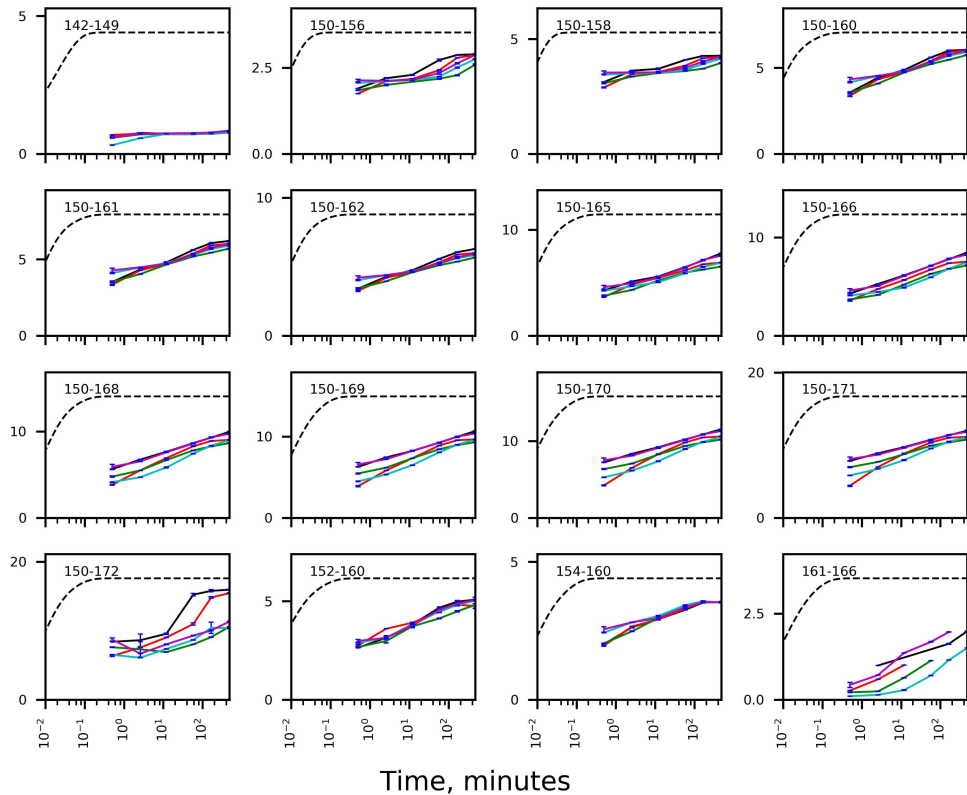

# IRE1 Uptake Traces

Number of Deuterons

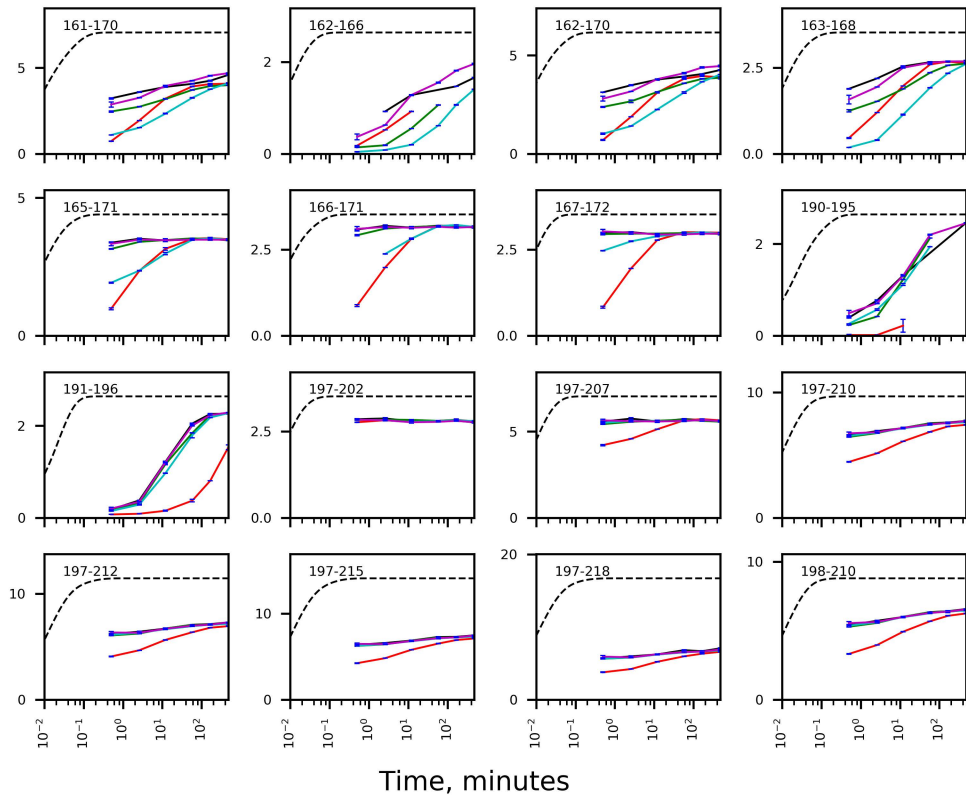

# IRE1 Uptake Traces

Number of Deuterons

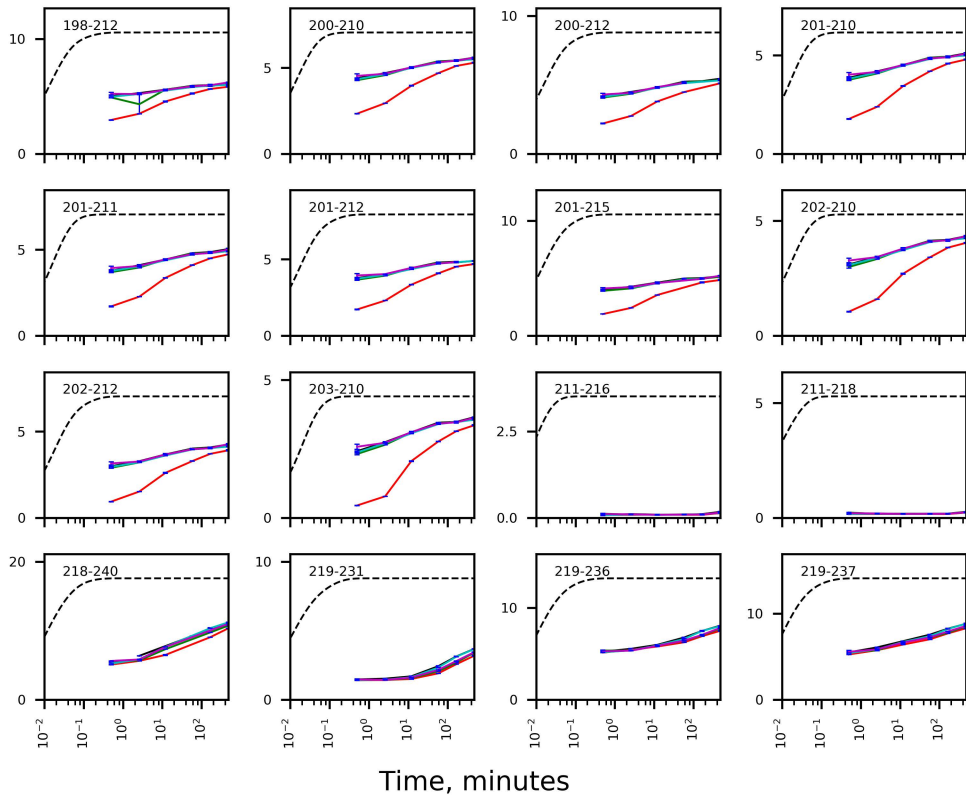



# IRE1 Uptake Traces

Number of Deuterons

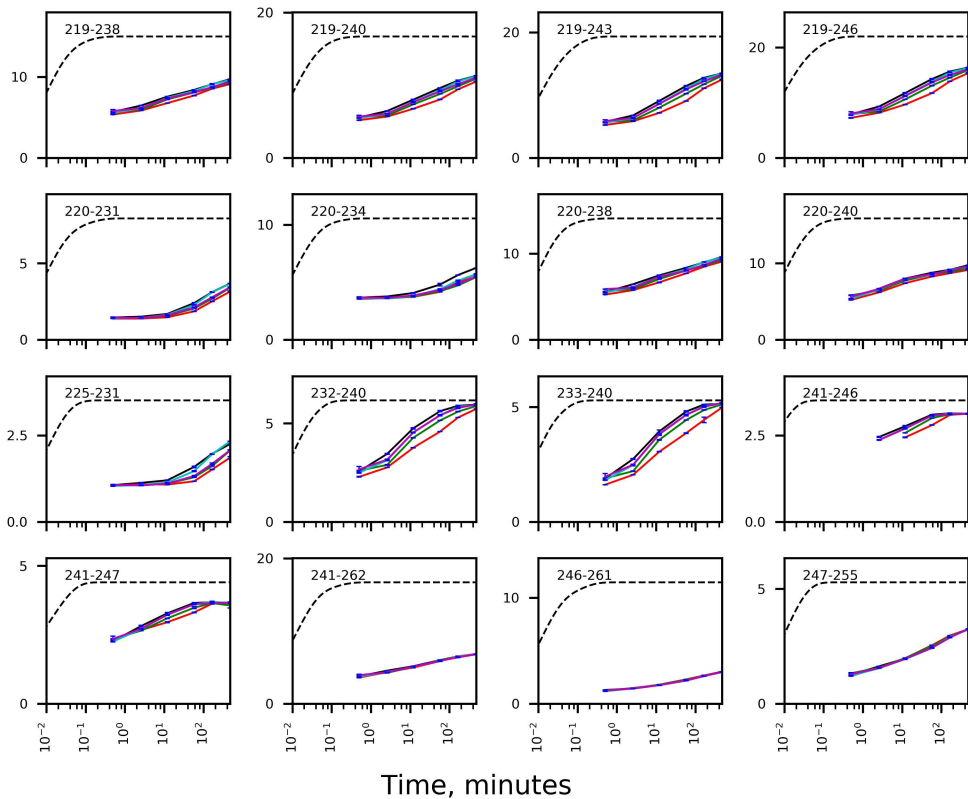

# IRE1 Uptake Traces

Number of Deuterons

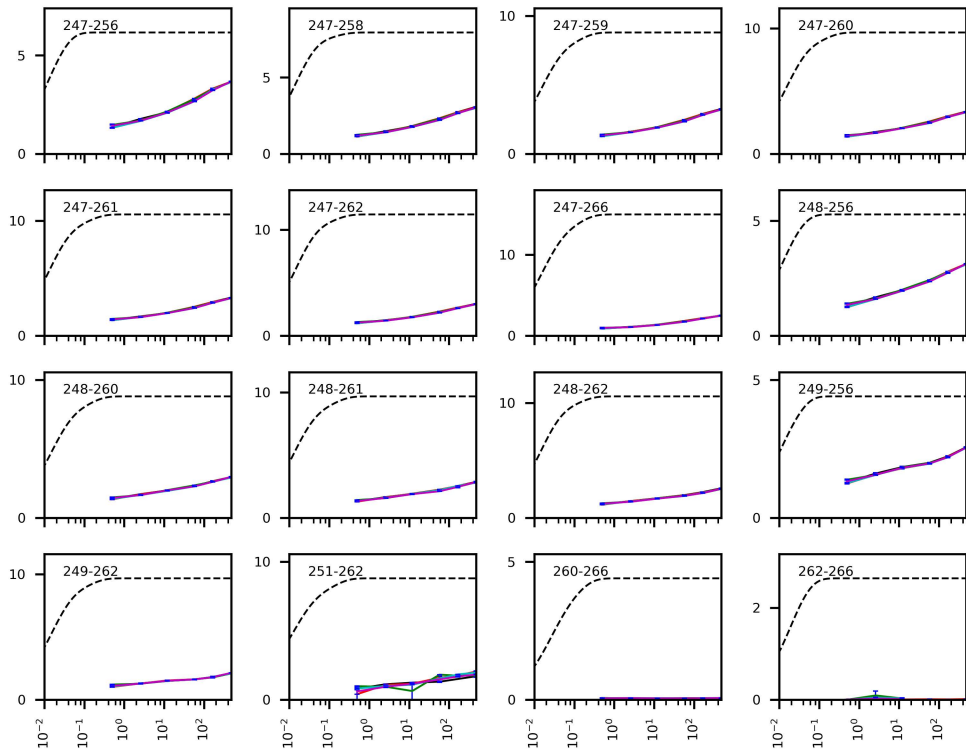

Time, minutes

# IRE1 Uptake Traces

Number of Deuterons

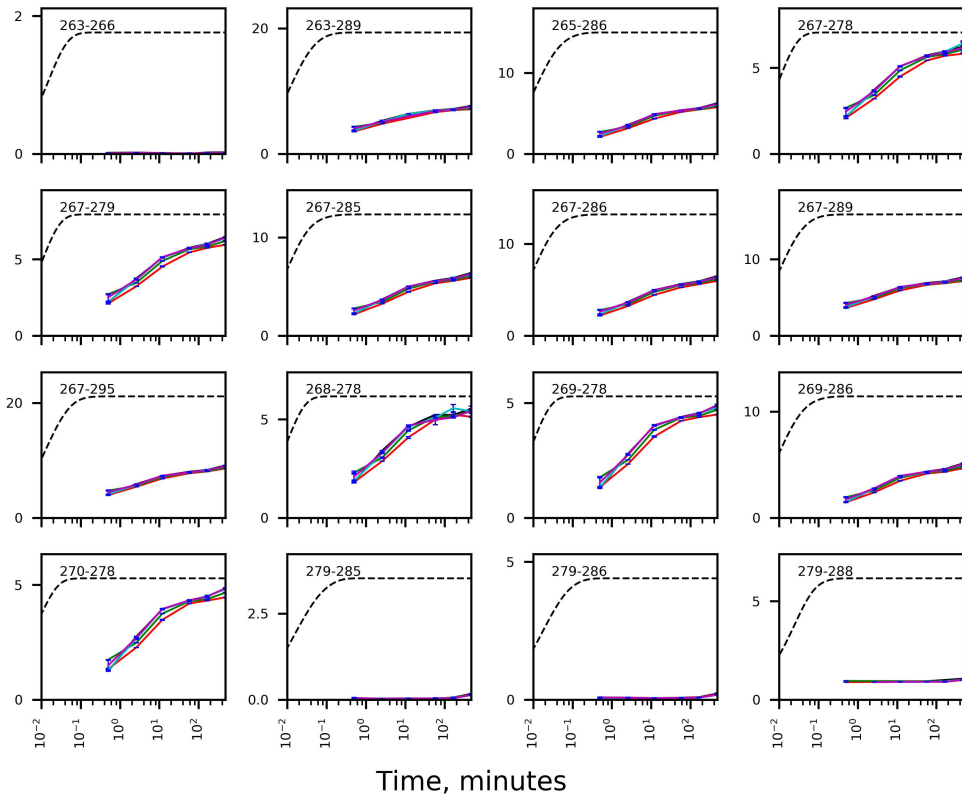

# IRE1 Uptake Traces

Number of Deuterons

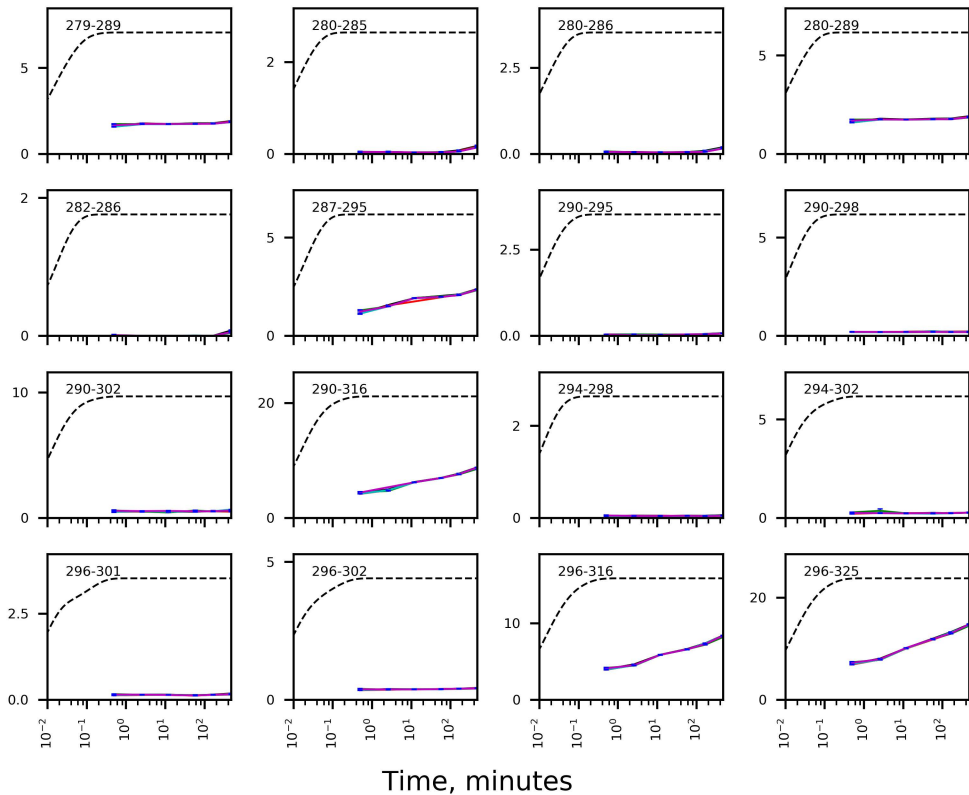

# IRE1 Uptake Traces

Number of Deuterons

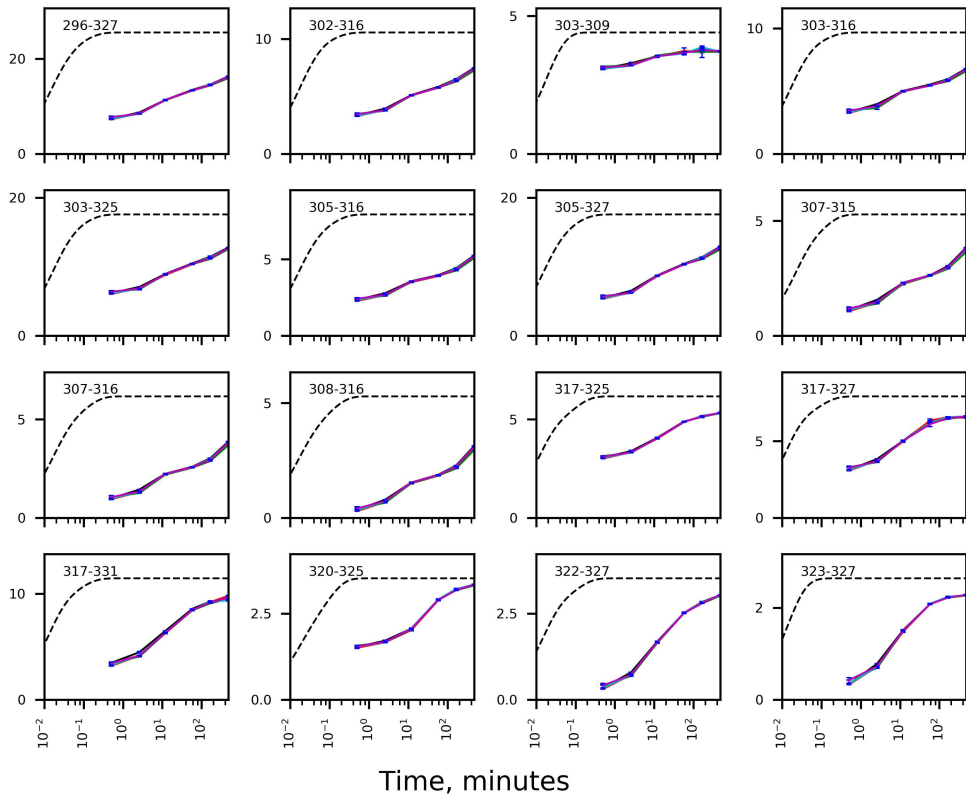

# IRE1 Uptake Traces

Number of Deuterons

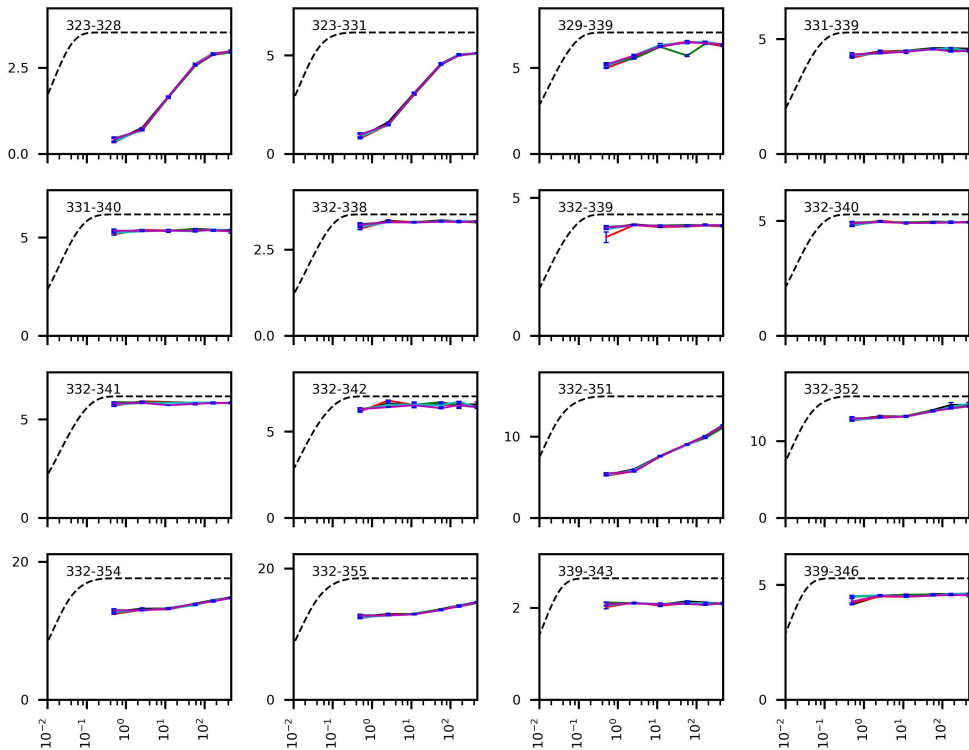

Time, minutes

# IRE1 Uptake Traces

Number of Deuterons

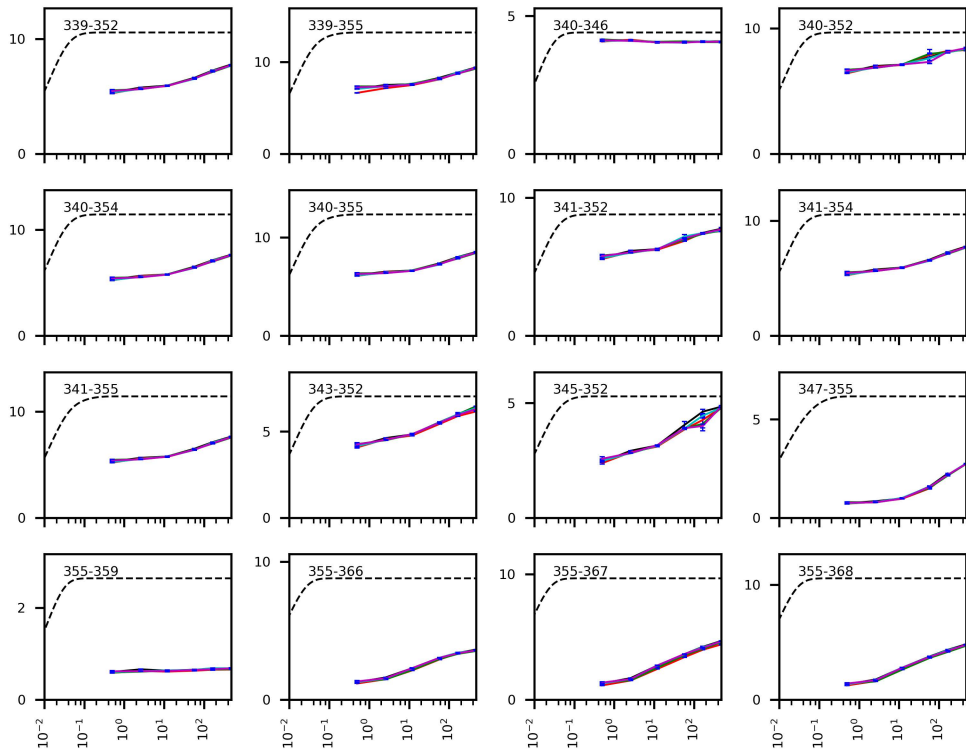

Time, minutes

# IRE1 Uptake Traces

Number of Deuterons

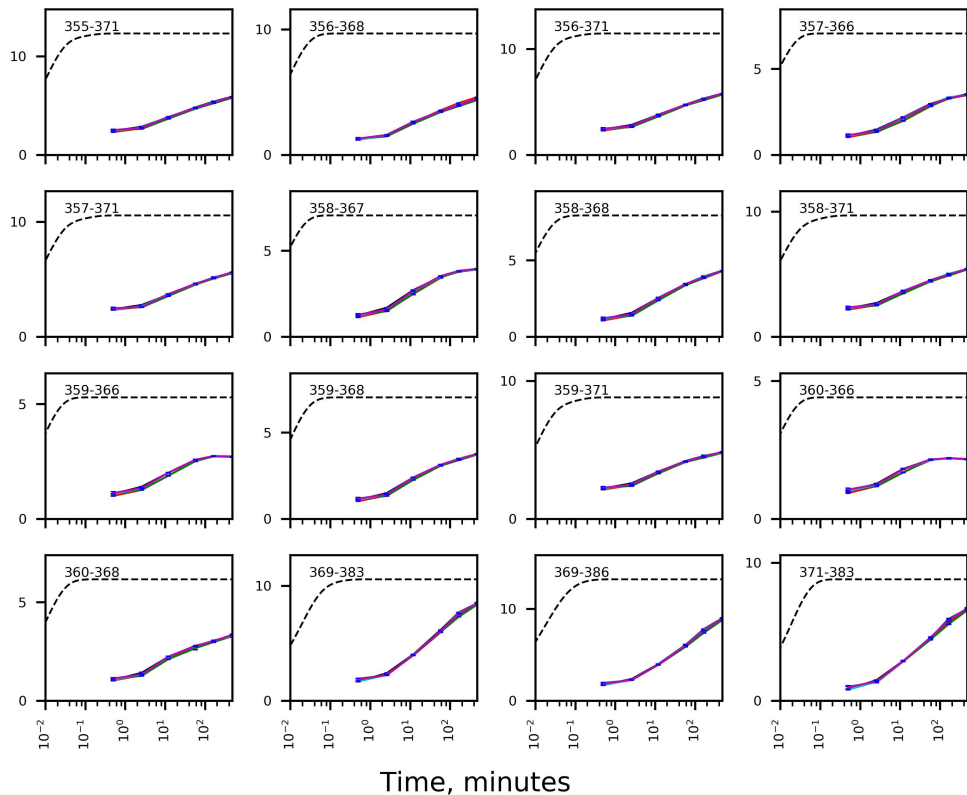



# IRE1 Uptake Traces

Number of Deuterons

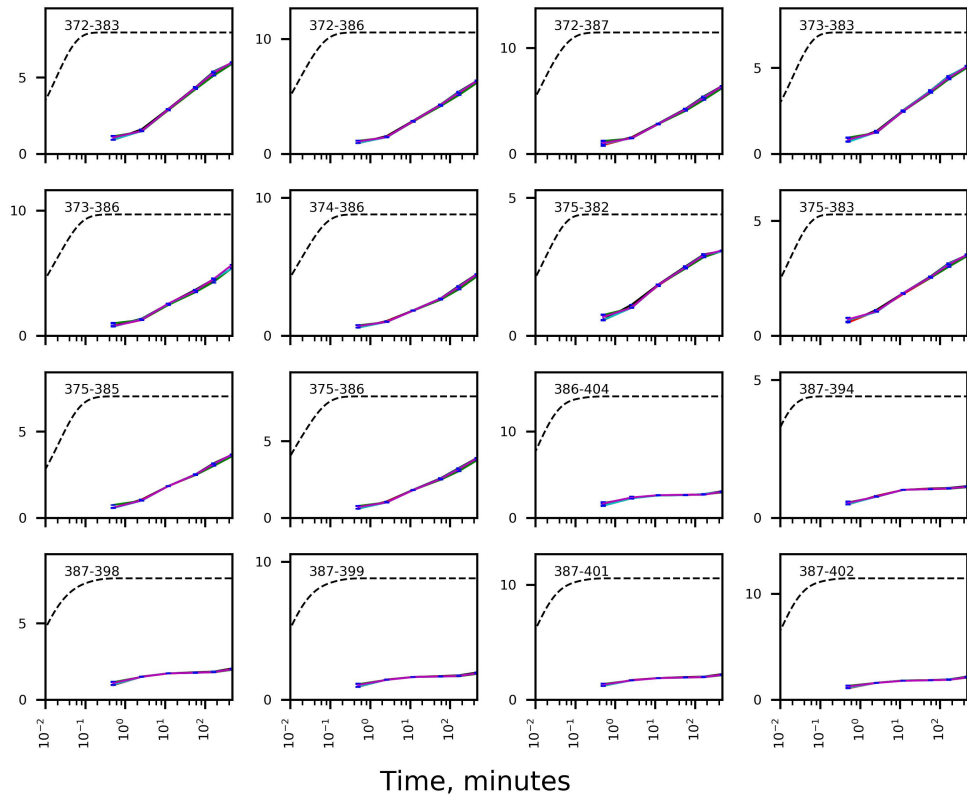

Time, minutes

# IRE1 Uptake Traces

Number of Deuterons

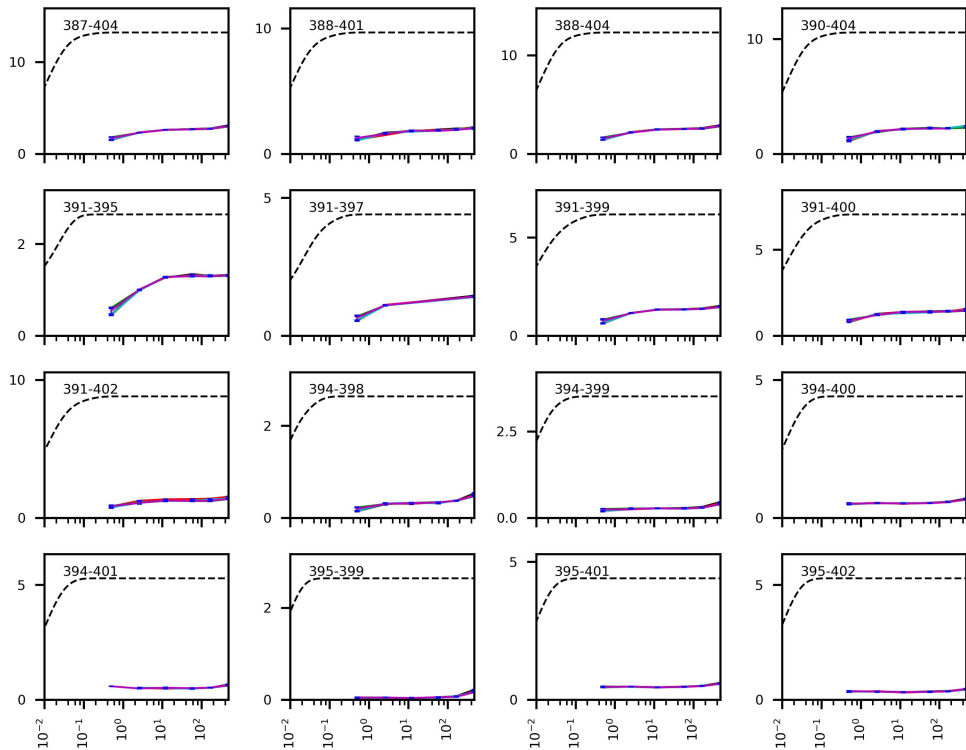

Time, minutes

# IRE1 Uptake Traces

Number of Deuterons

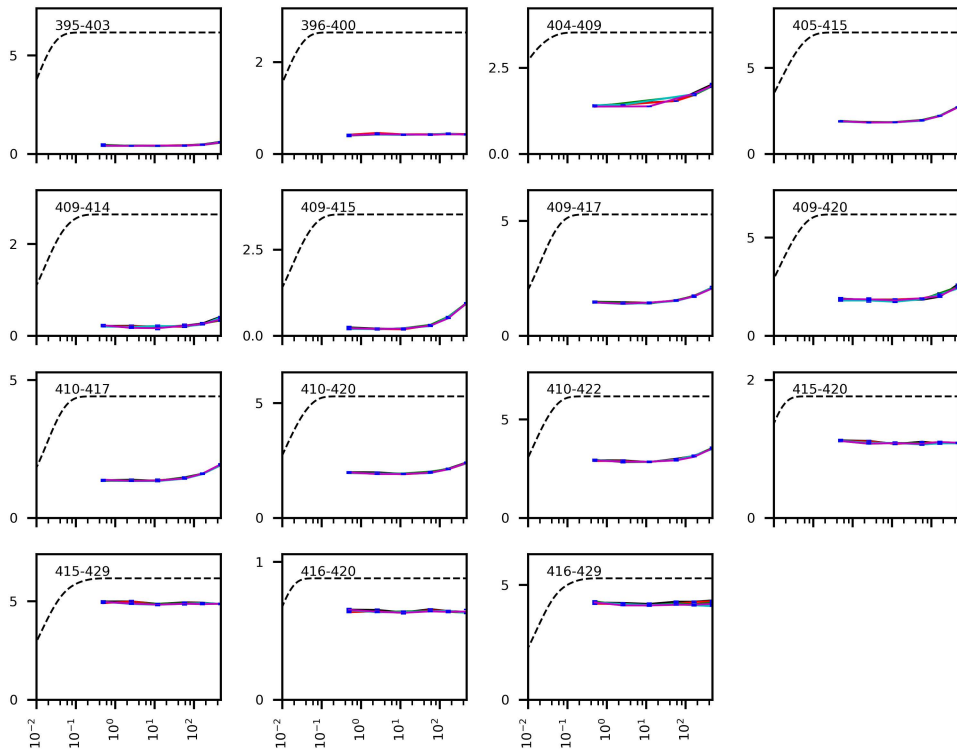

Time, minutes
